# Supplementary material for: TOR signalling is required for host lipid metabolic remodelling and survival following enteric infection in Drosophila
Source: PubMed Central journal article supplement (PMC9118046; doi:10.1242/dmm.049551), 2022-05-09
Supplement: dmm-15-049551-s1.pdf [file dmm-15-049551-s1.pdf]

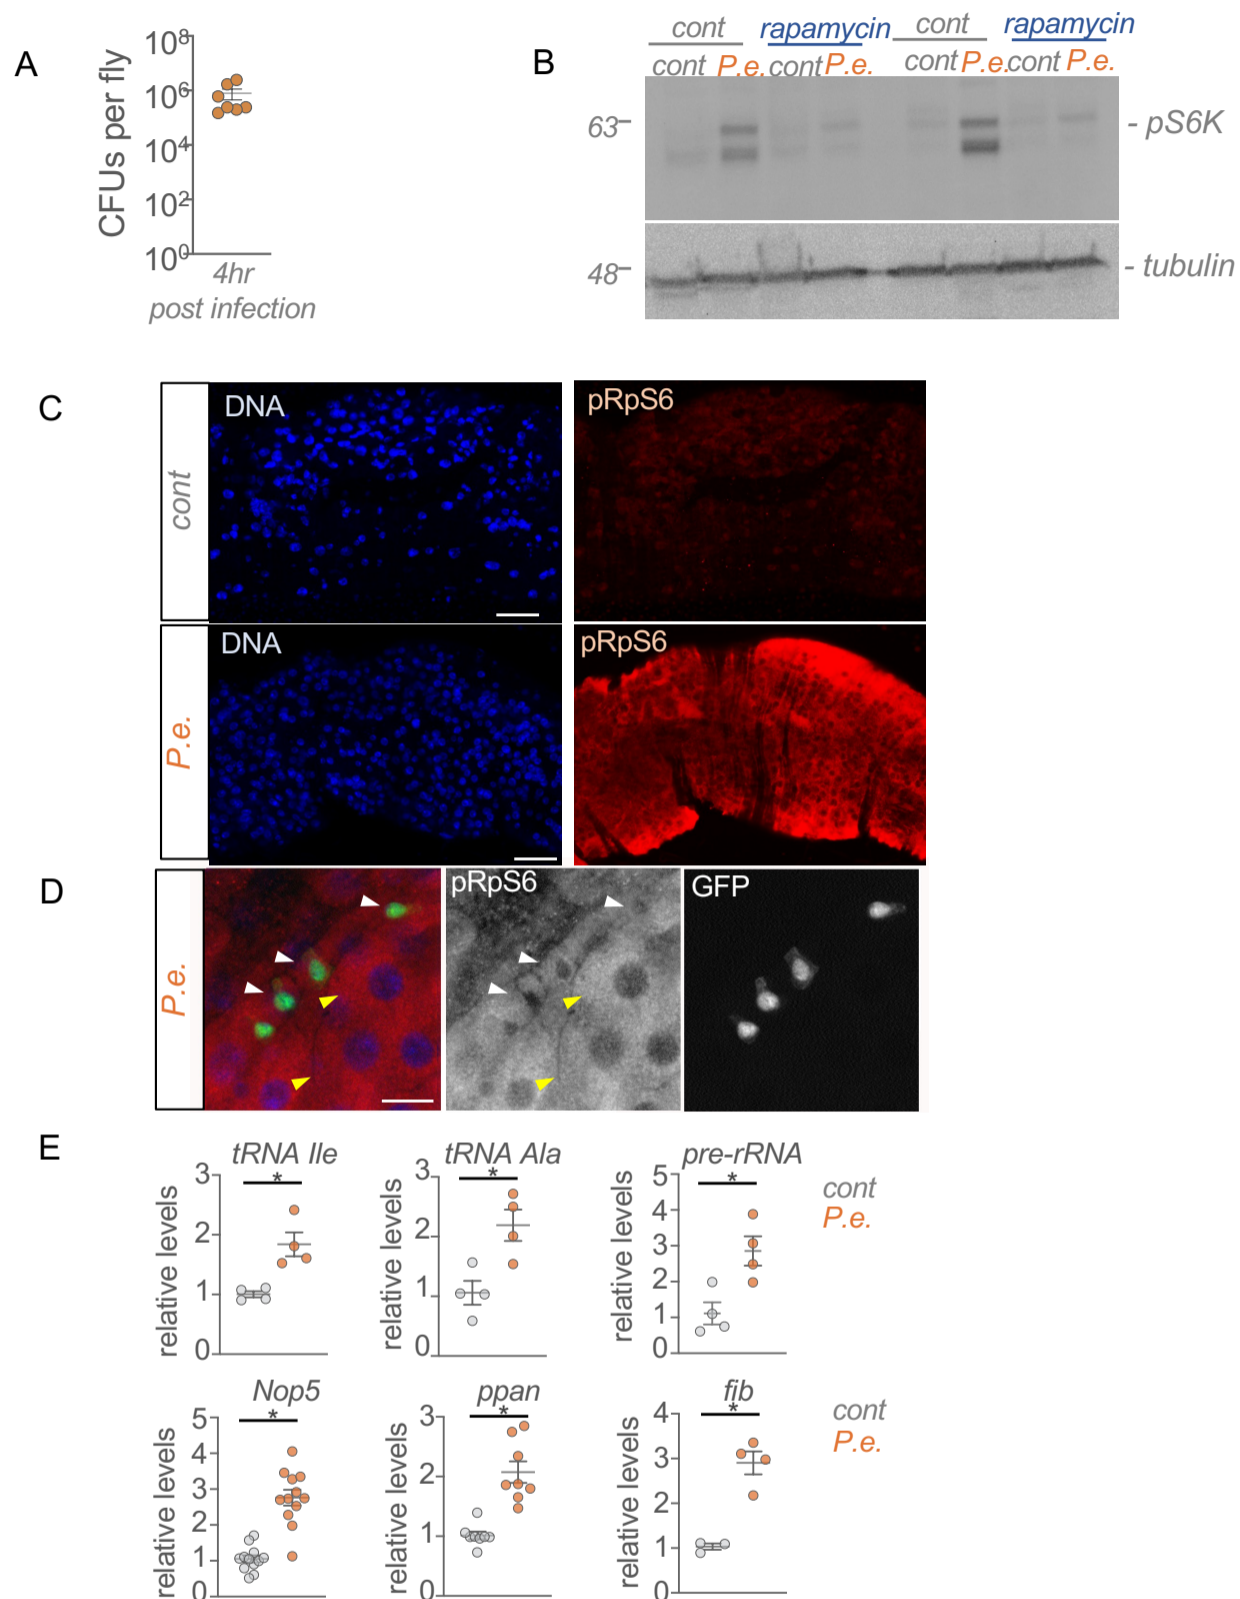

**Fig. S1 (related to Figure 1). Infection with *P.e.* stimulates TOR activity in adult intestines.** A) Pathogen abundance (in colony forming units, CFUs, per fly) at 4h following enteric *P.e.* infection. B) *w<sup>1118</sup>* females were pretreated for 24 hours with either DMSO (cont) or rapamycin, followed by 4hr of either sucrose (cont) or 4hr *P.e.* feeding (grey bars). Intestinal samples were analyzed by western blot using antibodies to phosphorylated S6K and actin (as a loading control). C) Phosphorylated RpS6 (pRpS6) immunostaining in control vs 4hr *P.e.* infected flies. Blue, DNA; Red, anti-phospho RpS6 staining. Scale bar = 50 micrometres. Increased phospho S6 levels were observed in 10 out of 10 infected guts analyzed. D) Phosphorylated RpS6 (pRpS6) immunostaining in control vs 4hr *P.e.* infected flies. Blue, DNA; Red, anti-phospho RpS6 staining; Green, GFP positive ISC/EB cells marked by *esgGal4*, *UAS-GFP* (white arrowheads). Yellow arrowheads indicate large polyploid enterocytes. Scale bar = 10 micrometres. E) qPCR analysis of tRNA, pre-rRNA and ribosome synthesis genes from intestinal samples of control or 4hr *P.e.* infected flies. Bars represent mean +/-SEM, individual data points are plotted as circles. \*p<0.05, Students t-test.

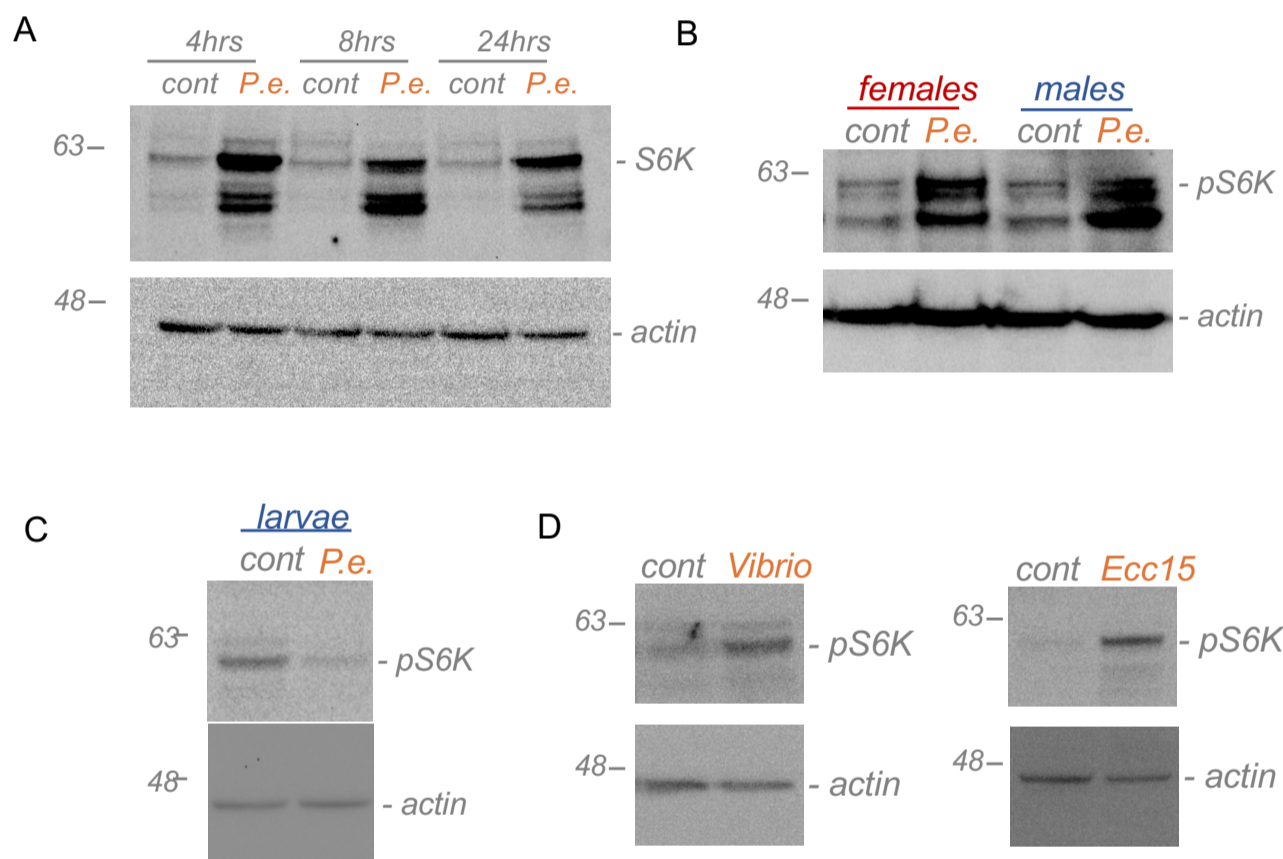

**Fig. S2 (related to Figure 1). Enteric bacterial infection stimulates TOR activity in adult male and female intestines.** A) Time course of *P.e.* infection on phosphorylated-S6K levels in intestines of *w<sup>1118</sup>* mated females. Dissected intestines were analysed by western blotting using antibodies against phosphorylated-S6K and actin (loading control). B) Western blots of intestines from adult male and female flies subjected to 4hr oral *P.e.* infection. Antibodies were against phosphorylated S6K (pS6K) and actin (loading control). C) Western blots of intestines from third instar larvae subjected to 4hr oral *P.e.* infection. Antibodies were against phosphorylated S6K (pS6K) and actin (loading control). D) Western blots of intestines from adult flies subjected to 4hr oral infection with *V. Cholera* or *Ecc15*. Antibodies were against phosphorylated S6K (pS6K) and actin (loading control).

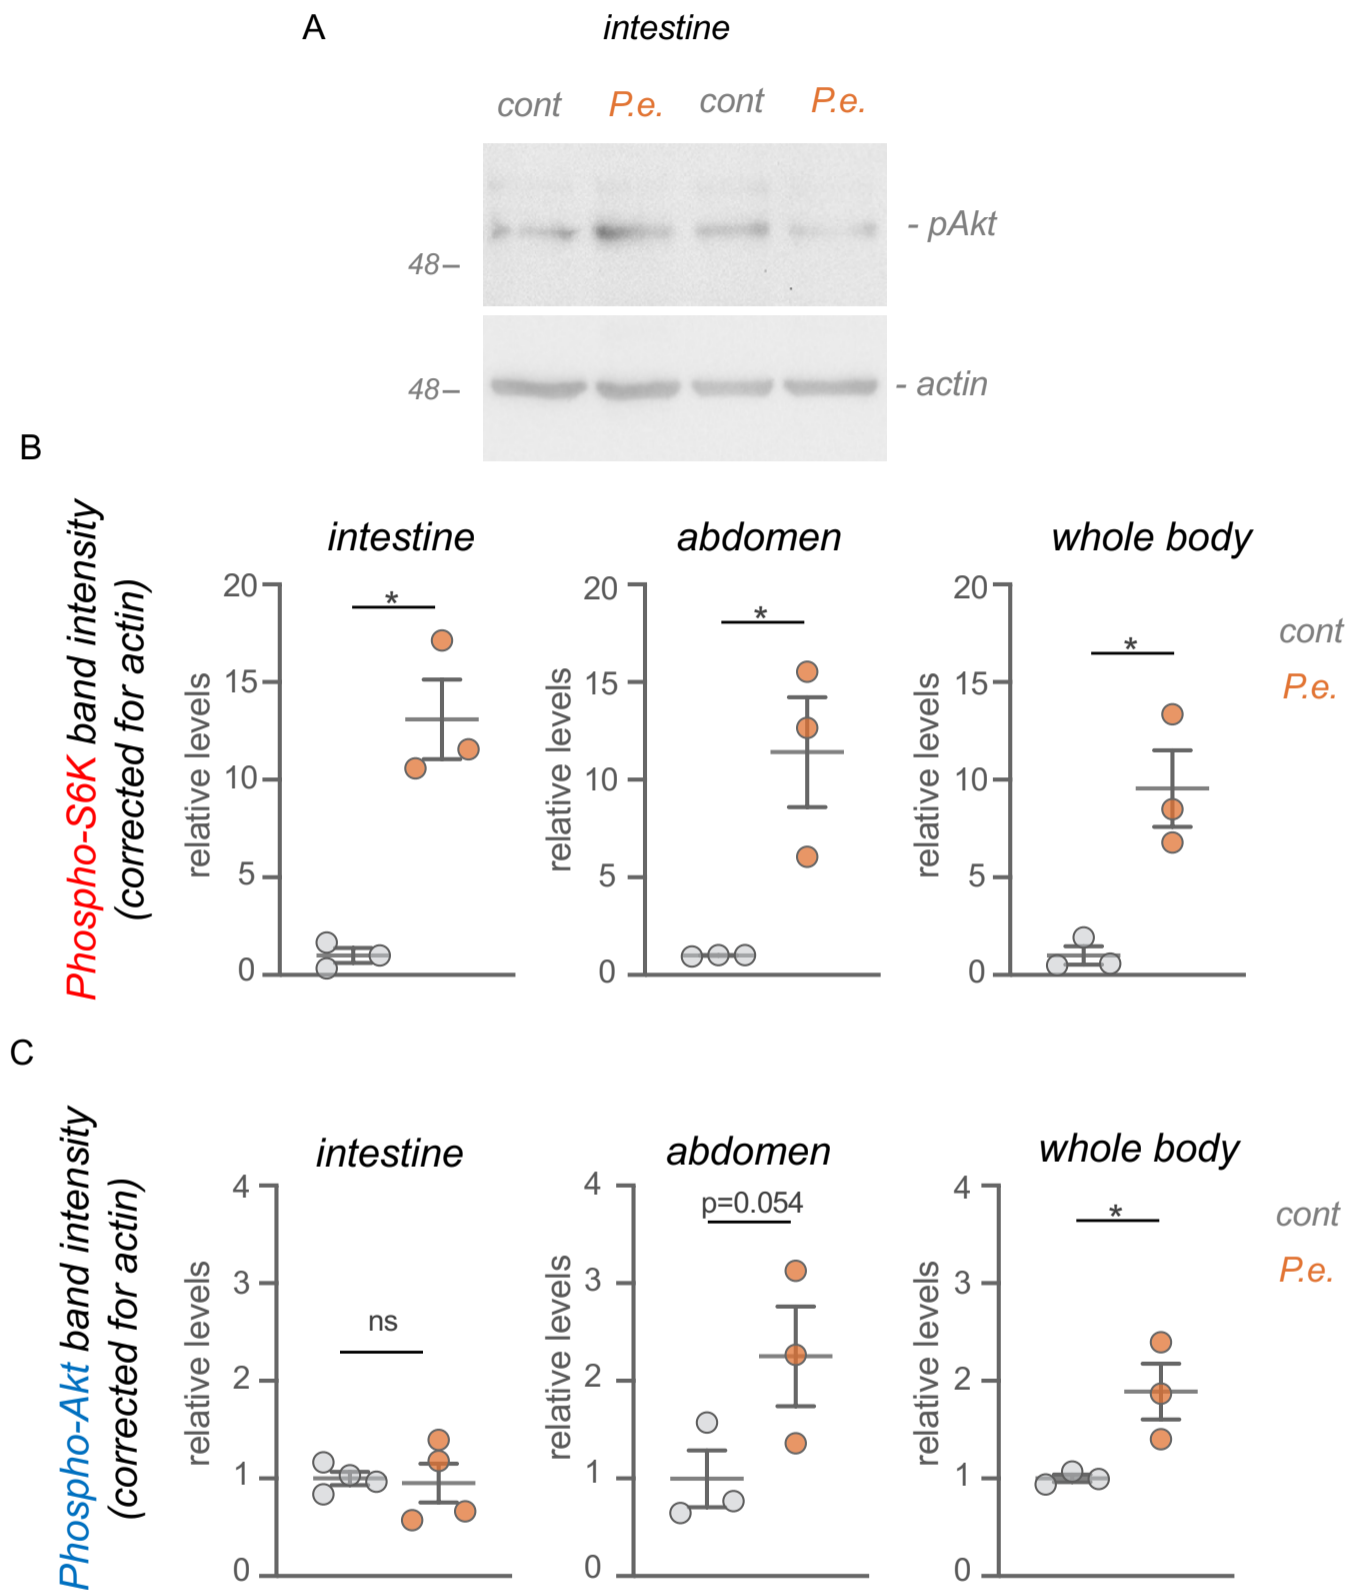

**Fig. S3 (related to Figure 1). Enteric bacterial infection effects on S6K and Akt phosphorylation in the intestine, abdomen and whole-body.** A) Western blots of intestinal samples from adult flies subjected to 4hr oral *P.e.* infection using antibodies to phosphorylated Akt, (pAkt) and actin (as a loading control). B, C) Quantification of B) phosphoS6K and C) phosphoAkt, western blots of intestinal, abdominal and whole-body samples from adult flies subjected to 4hr oral *P.e.* infection. Band intensities were corrected for actin levels. Bars represent mean  $\pm$  SEM, individual data points are plotted as circles. \* $p < 0.05$ , ns= not significant, Students t-test.

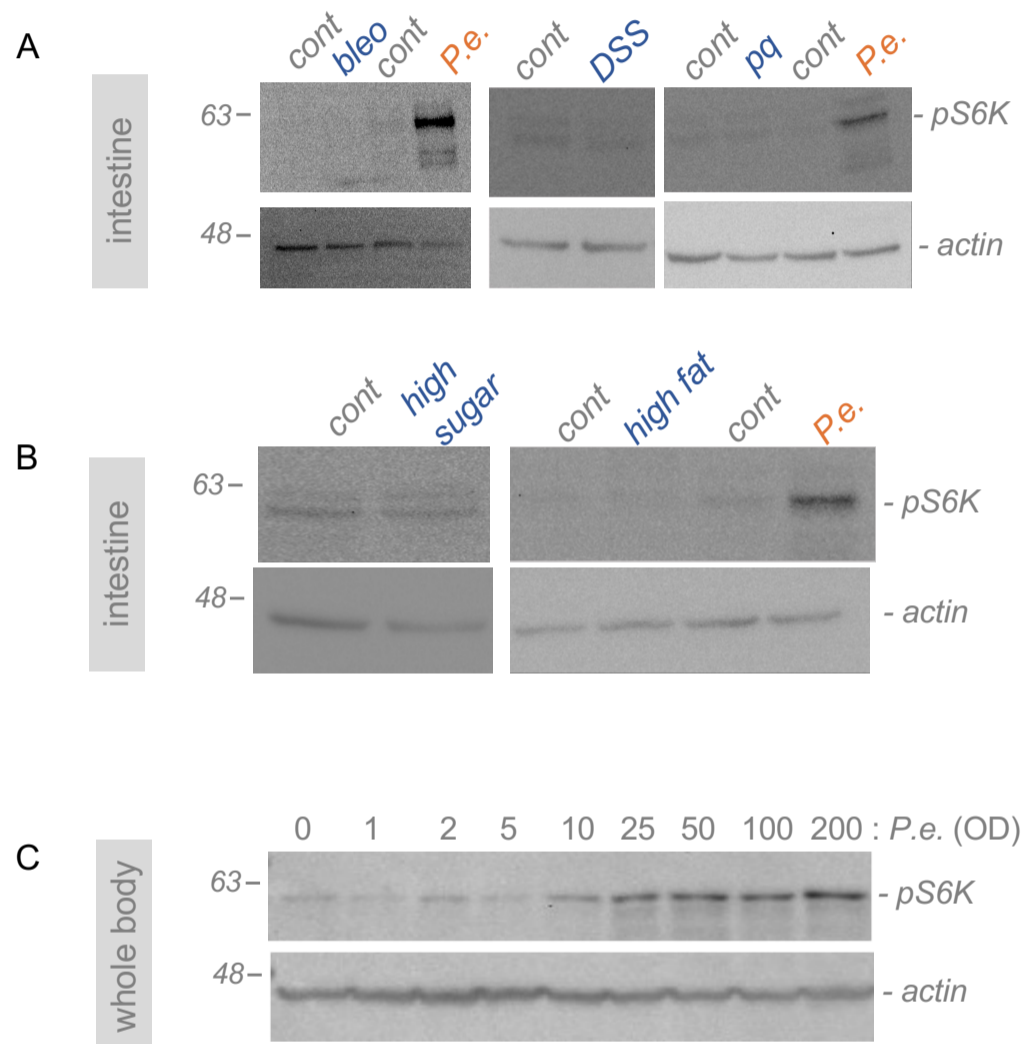

**Fig. S4 (related to Figure 1). Enteric bacterial infection, but not other environmental stress, stimulates TOR activity in the intestine.** A) Western blot of dissected intestines from adult flies subjected to 4hr treatments of chemical stressors: 25μg/ml Bleomycin, 5% DSS, 2mM paraquat. Antibodies were against phosphorylated S6K (pS6K) and actin (loading control). B) Western blot of dissected intestines from adult flies subjected to 4hr feeding with high sugar (40% sucrose), high fat (30% lard) or *P.e.* Antibodies were against phosphorylated S6K (pS6K) and actin (loading control). C) Western blot of whole-body samples from adult flies subjected to 4hr feeding with different concentrations (OD<sub>600</sub> 1-200) of *P.e.* Antibodies were against phosphorylated S6K (pS6K) and actin (loading control).

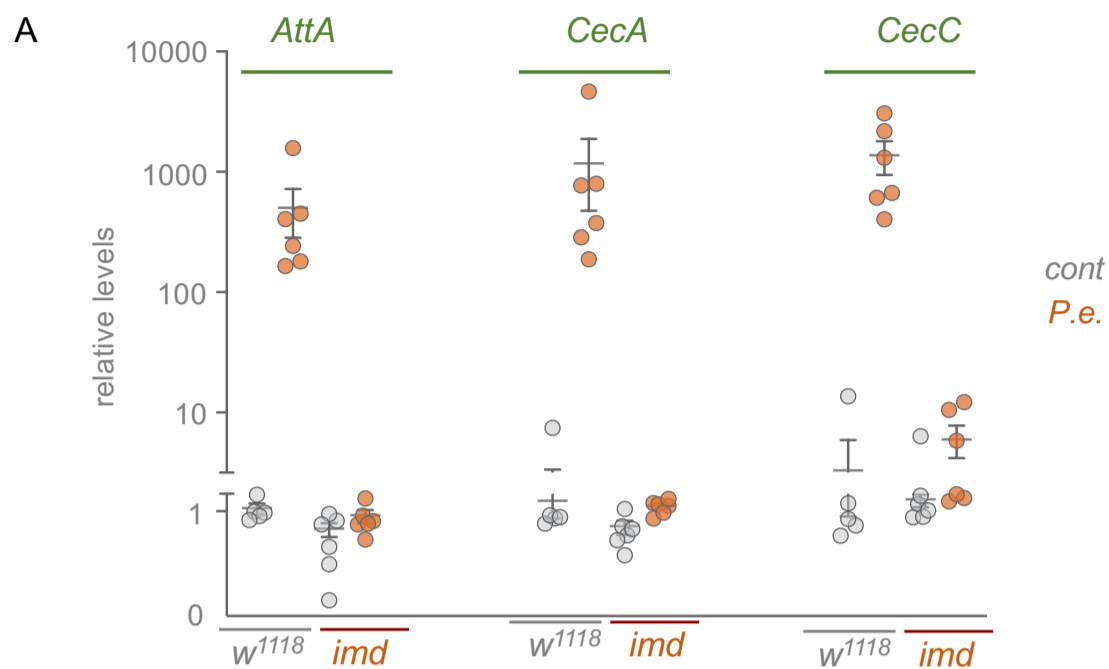

**Fig. S5 (related to Figure 2). AMP induction is blocked in *imd* mutants.** qPCR analysis of AMP genes from whole-body samples of *w<sup>1118</sup>* or *imd* mutant animals following 24hr of *P.e.* infection. Bars represent mean +/-SEM, individual data points are plotted as circles.

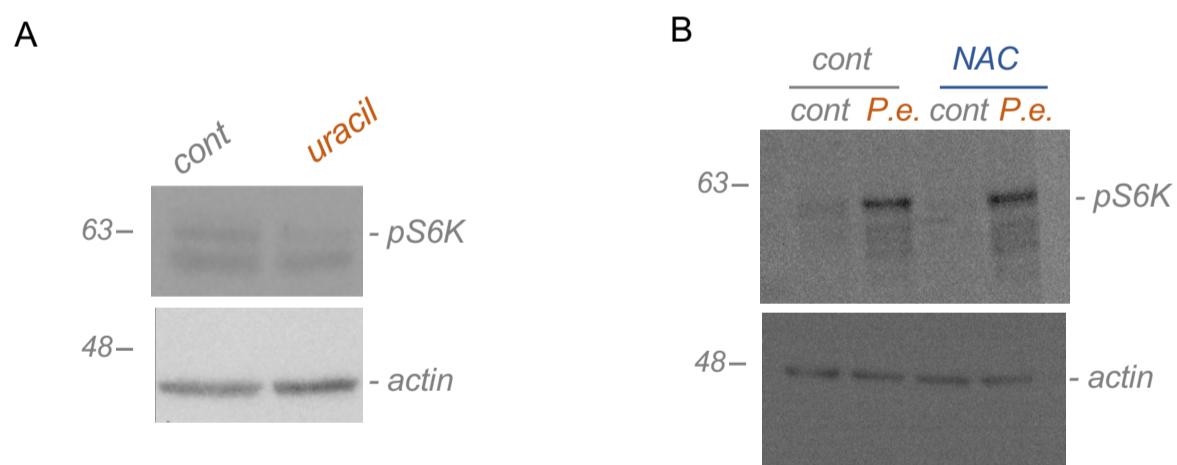

**Fig. S6 (related to Figure 2). Uracil or ROS are not involved in TOR induction.** A) Western blot of dissected intestines from adult control vs 4hr uracil-fed flies. Antibodies were against phosphorylated S6K (pS6K) and actin (loading control). B) Western blot of dissected intestines from adult control vs 4hr *P.e.* infected flies that had been pretreated for 2 days with either water (control) or N-acetyl cysteine (NAC). Antibodies were against phosphorylated S6K (pS6K) and actin (loading control).

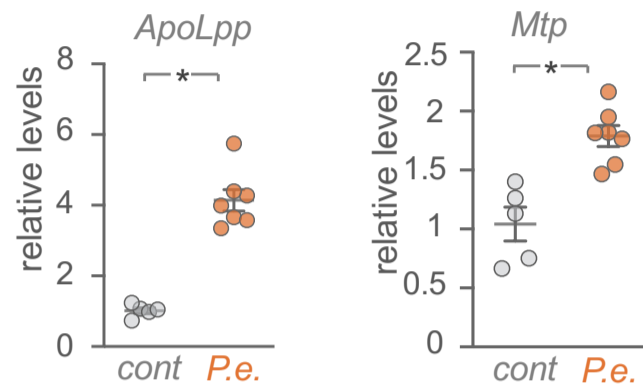

**Fig. S7 (related to Figure 4). Enteric infection increases the expression of apolipoprotein mRNAs.** qPCR analysis of *ApoLpp* or *Mtp* from whole-body samples of *control* vs 24hr infected *P.e.* animals. Bars represent mean +/-SEM, individual data points are plotted as circles.

**Table S1. A list of primers used in this study**

| Gene name                                  | Forward sequence                     | Reverse sequence                    |
|--------------------------------------------|--------------------------------------|-------------------------------------|
| Fatty acid synthetase<br>1(CG3523) (FASN1) | TCCCAGAGGCAAACATTACC                 | TCGGGGAAATGAAGAAGATG                |
| Acetyl-CoA carboxylase<br>(CG11198) (ACC)  | GCCAAGAGCATAACGAGGAG                 | GCTCCAGATGCCGGTAAATA                |
| Midway (DGAT)                              | CTCTTTAGTGCATATCTCGCTCTG             | AACAAGCCCAAGCCCTCT                  |
| lipin                                      | CTCGGCGGCTATCAAAA                    | ACCTTGTCGTTGTGCTTCCA                |
| Lipid storage droplet<br>(LSD)-2           | AGAGCAAGGTGATCGATGTG                 | ACTCCGTTGACAGCCAGACT                |
| Mondo                                      | GCGGCGTTACAACATAAAGA                 | CTCCATGCGCAAAGCTTCAA                |
| SREBP                                      | AAGGACACTCTCTGGGCTGA                 | GCTTGATCCTGCCGTACAAT                |
| GlyP                                       | CAACTGGTTGCTCTGAAGAAGTG<br>G         | CTGGCGCTTGTACTIONCGTGAATACG         |
| tRNA Ala                                   | GCGGCCGCACTTCACTGACCGGA<br>A<br>ACG  | GCGGCCGCGCCCGTTCTAACTTTTT<br>GGA    |
| tRNA Ile                                   | CGACCTTCGCGTTATTAGCA                 | GGCCATTAGCTCAGTTGGT                 |
| tRNA Arg                                   | GCGGCCGCGTCCGTCCACCAATG<br>AA<br>AAT | GCGGCCGCGGCTAGCTCAGTCGG<br>T<br>AGA |
| Diptericin                                 | GGCTTATCCGATGCCCCGACG                | TCTGTAGGTGTAGGTGCTTCCC              |
| Attacin A                                  | AGGAGGCCCATGCCAATTTA                 | CATTCCGCTGGAACCTCGAAA               |
| Cecropin A                                 | TCTTCGTTTTTCGTCGCTCTCA               | ATTCCCAGTCCCTGGATTGTG               |



|              |                       |                       |
|--------------|-----------------------|-----------------------|
| Cecropin C   | TCATCCTGGCCATCAGCATT  | CGCAATTCCCAGTCCTTGAAT |
| Drosocin     | TTTGTCCACCACTCCAAGCAC | ATGGCAGCTTGAGTCAGGTGA |
| Metchnikowin | CGATTTTCTGGCCCTGCT    | CCGGTCTTGGTTGGTTAGGAT |
| Act5C        | GAGCGCGGTTACTCTTTCAC  | ACTTCTCCAACGAGGAGCTG  |
| RpS9         | AAACCTGCTCGGTTGAATTG  | TTGTTGCGCAGACCATACTC  |
| 5S RNA       | ACGACCATACCACGCTGAAT  | AGCGGTCCCCCATCTAAGTA  |
